# Supplementary material for: TRIM25 promotes the cell survival and growth of hepatocellular carcinoma through targeting Keap1-Nrf2 pathway
Source: PubMed Central journal article supplement (PMC6969153; doi:10.1038/s41467-019-14190-2), 2020-01-17
Supplement: 41467_2019_14190_MOESM1_ESM.pdf [file 41467_2019_14190_MOESM1_ESM.pdf]

**TRIM25 promotes the cell survival and growth of hepatocellular carcinoma through targeting Keap1-Nrf2 pathway**

*Liu et al.*

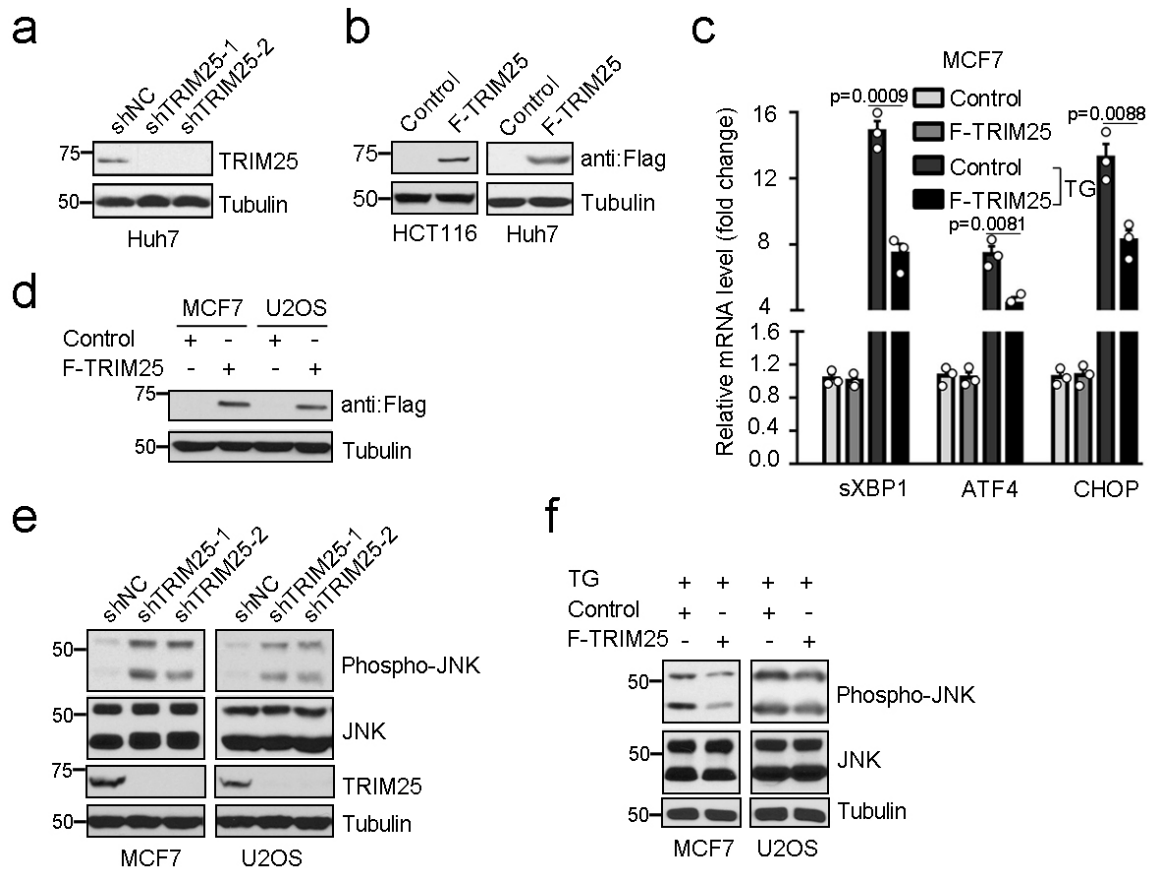

### Supplementary Figure 1 | TRIM25 localizes at ER and suppresses UPR signaling

**a** Western blot analysis of the efficiency of the stable cell knockdown of TRIM25 in Huh7 cells. **b** Western blot analysis of HCT116 and Huh7 cells stably overexpressing control or F-TRIM25 vectors. **c** Relative mRNA fold change of UPR genes: sXBP1, ATF4, CHOP in MCF7 cells stably overexpressing control or F-TRIM25, treated with or without TG (1  $\mu$ M) for 6 h. Data represent the mean  $\pm$  SEM (n = 3). Statistical significance was assessed using two-tailed Student's t-test. **d** Western blot analysis of HCT116 and Huh7 cells stably overexpressing control or F-TRIM25 vectors in MCF7 and U2OS cells. **e** Western blot analysis of the levels of phospho-JNK/JNK in MCF7 and U2OS overexpressing control or F-TRIM25, treated with TG (1  $\mu$ M) for 12 h. **f** Western blot analysis of the levels of phospho-JNK/JNK in MCF7 and U2OS cells after stable knockdown of TRIM25.

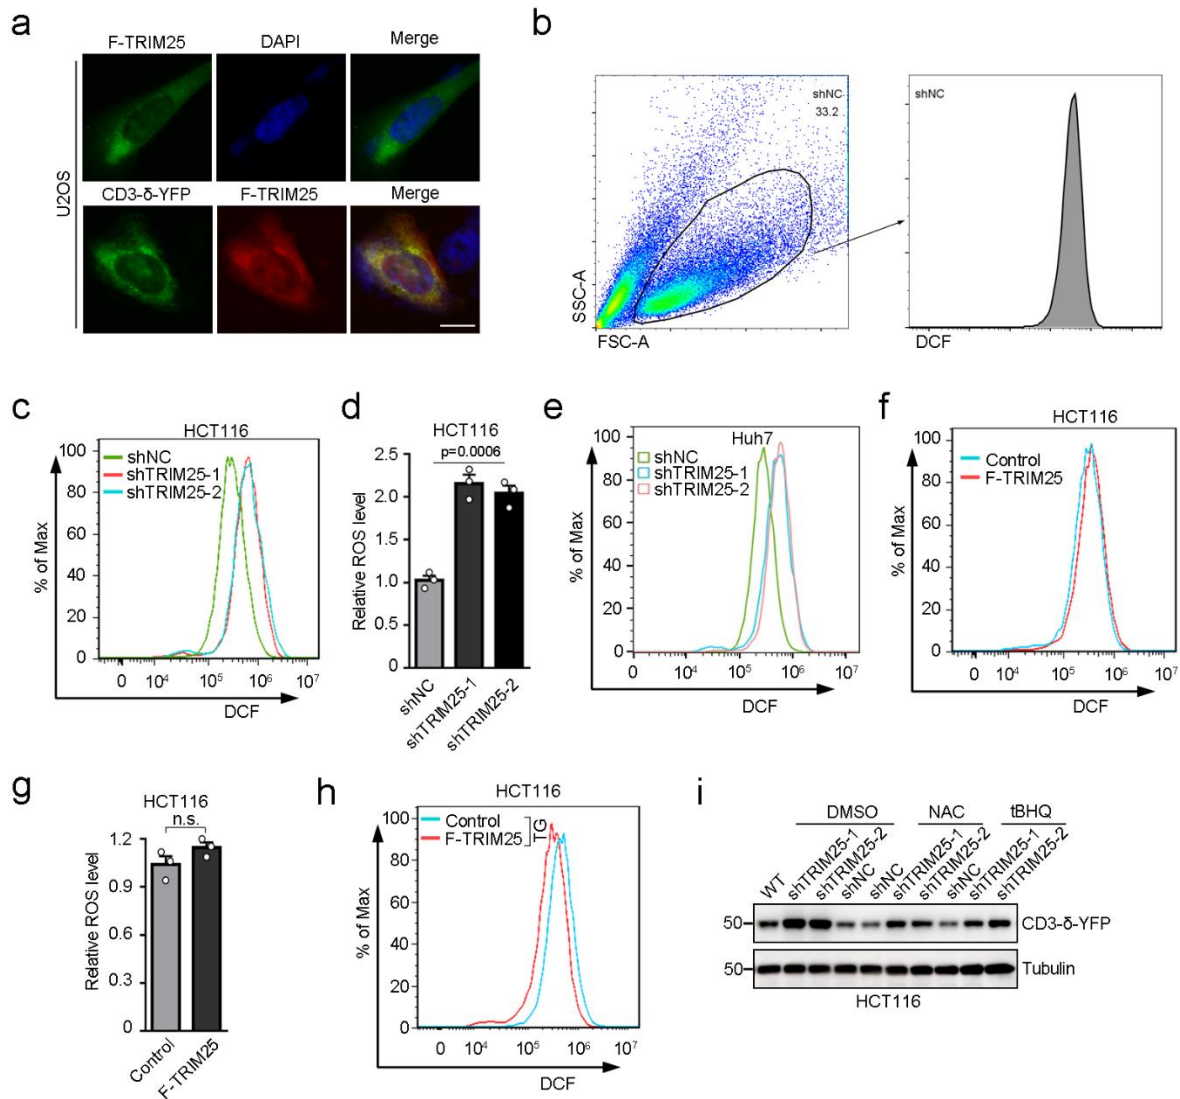

### Supplementary Figure 2 | TRIM25 negatively regulates ROS

**a** Co-localization of F-TRIM25 (red) and ERAD substrate CD3- $\delta$ -YFP (green) in U2OS cells analyzed by fluorescence microscopy. TRIM25 was detected by anti-Flag antibody and the nucleus by DAPI (blue). Scale bar, 10  $\mu$ m. **b** Gating strategy to determine the cellular ROS level presented on Fig 2f, g, j, k and Supplementary Fig 2c, e, f and h. **c, d** Flow cytometry analysis of ROS levels in HCT116 cells for control and stable knockdown of TRIM25 (**c**) quantified data is shown as (**d**). **e** Flow cytometry analysis of ROS levels in Huh7 cells stable knockdown of control or TRIM25. **f, g** Flow cytometry analysis of ROS levels in HCT116 cells stably overexpressing control or F-TRIM25 (**f**) quantified data is shown as (**g**). **h** Flow cytometry analysis of ROS levels in control and F-TRIM25-expressing HCT116 cells treated with TG (1  $\mu$ M) for 6 h. **i** Western blot analysis of the levels of CD3- $\delta$ -YFP in HCT116 cells with control (shNC) or stable knockdown of TRIM25, treated with DMSO, NAC (2 mM) or tBHQ (20  $\mu$ M) for 4h. For **d** and **g**, data represent the mean  $\pm$  SEM (n = 3). Statistical significance was assessed using two-tailed Student's t-test. n.s. not significant.

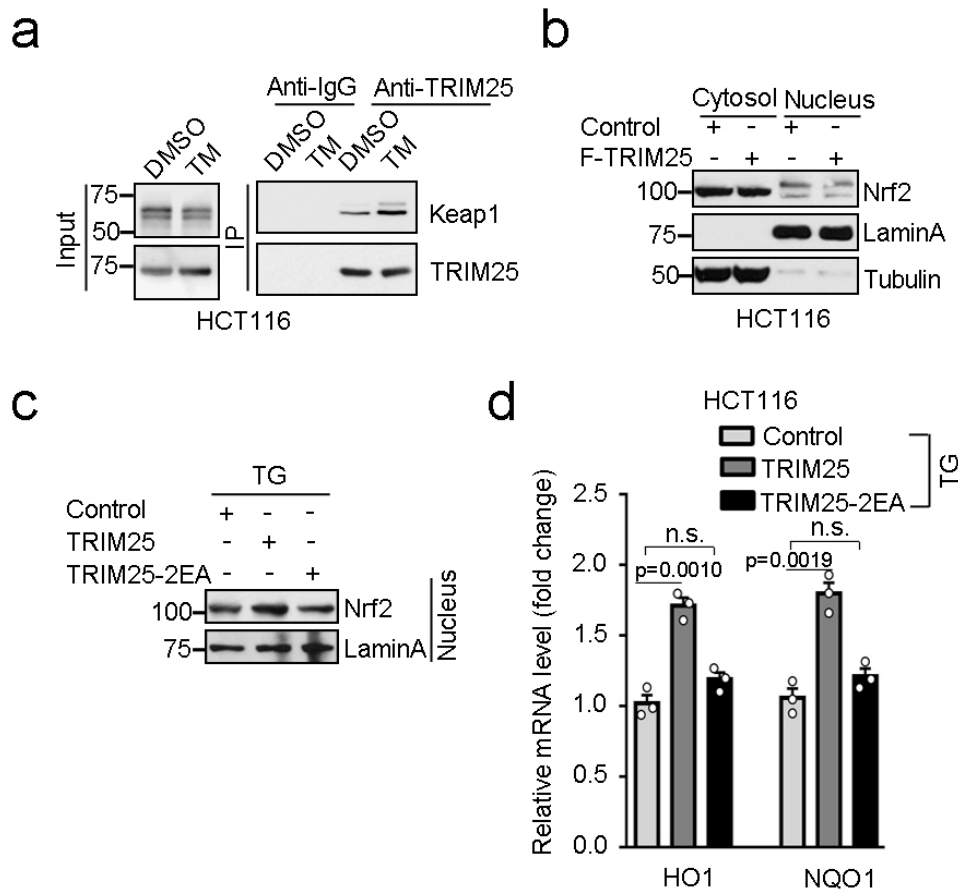

### Supplementary Figure 3 | The E3 ubiquitin activity of TRIM25 is required for Nrf2 regulation

**a** Co-immunoprecipitation (co-IP) assay analyzes the interaction of endogenous TRIM25 and Keap1 in HCT116 cells, treated with or without TM (5  $\mu$ g/ml) for 12 h. Cell lysates containing comparable amounts of TRIM25 or Keap1 were analyzed for the TRIM25-Keap1 interaction. **b** Nuclear/cytosolic fractionation assay and western blot analysis of the level of Nrf2 in control and F-TRIM25-expressing HCT116 cells. LaminA is an internal control for nuclear fraction. **c** The level of Nrf2 in the nuclear fraction of HCT116 cells with control, TRIM25-2EA or TRIM25-expressing, treated with TG (1  $\mu$ M) for 12 h. **d** Relative mRNA fold change of Nrf2 downstream genes HO1, NQO1 in HCT116 cells expressing control, TRIM25 or TRIM25-2EA, treated with TG (1  $\mu$ M) for 12 h. Data represent the mean  $\pm$  SEM (n = 3). Statistical significance was assessed using two-tailed Student's t-test. n.s. not significant.

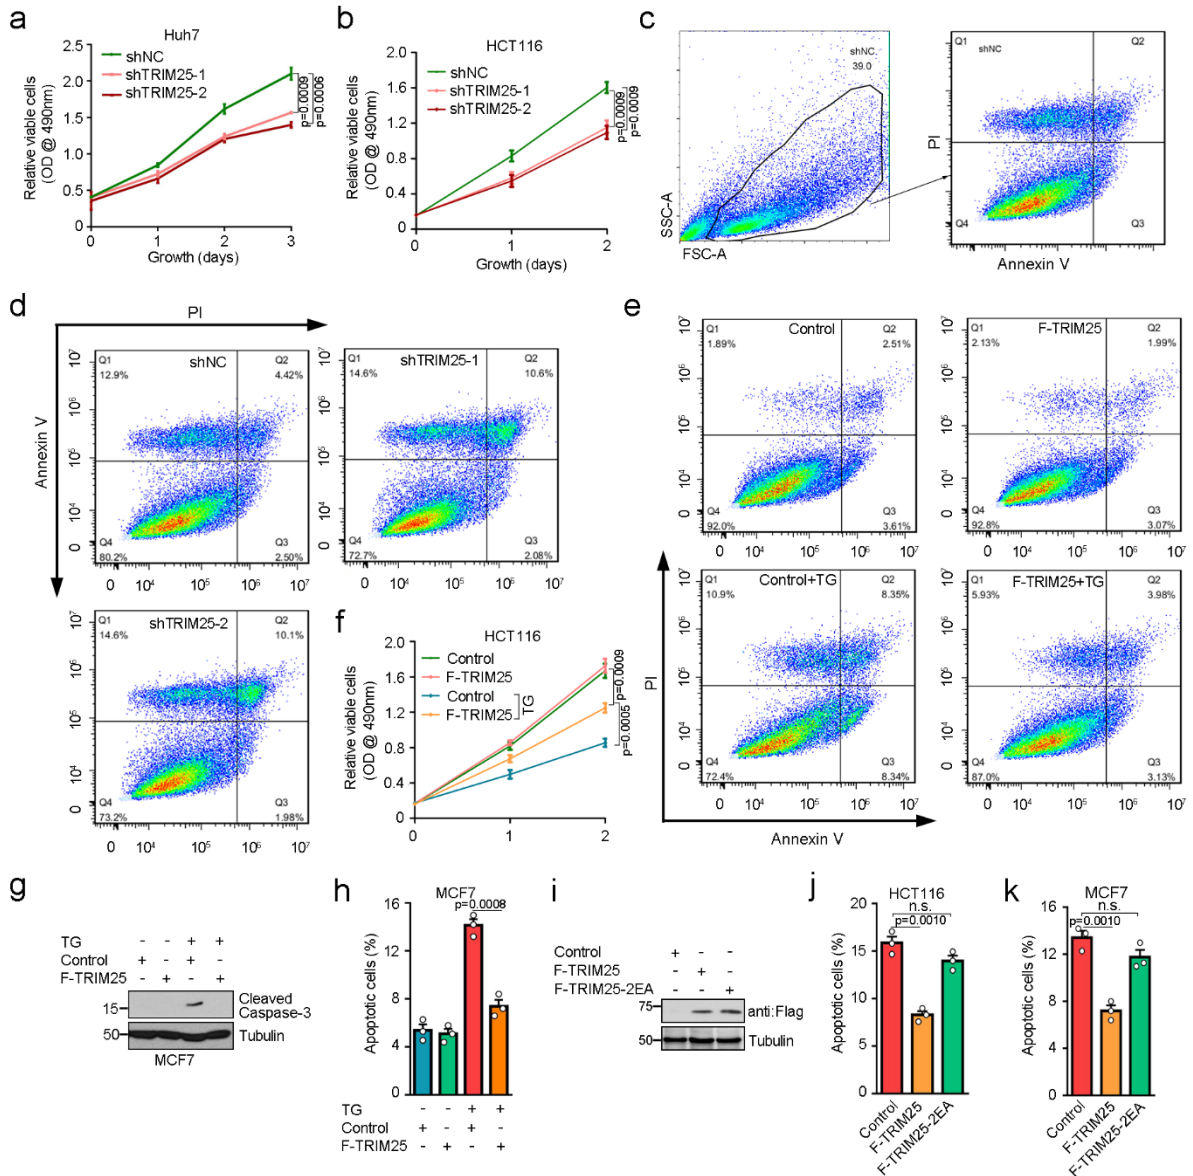

### Supplementary Figure 4 | TRIM25 negatively regulates tumor cell apoptosis

**a** Cell growth of Huh7 cells in control (shNC) or after stable knockdown of TRIM25. Data represent the mean  $\pm$  SEM (n=6). **b** Cell growth of HCT116 cells in control (shNC) or after stable knockdown of TRIM25. Data represent the mean  $\pm$  SEM (n=6). **c** Gating strategy to determine the percentage of apoptotic cells presented on Fig 5c, d, g, h, k, m and Supplementary Fig 4d, e, h, j and k. **d** Representative flow cytometry analysis of apoptosis in HCT116 cells stable knockdown of control (shNC) or TRIM25. **e** Representative flow cytometry analysis of apoptotic HCT116 cells expressing control and F-TRIM25, treated with or without TG (1  $\mu$ M) for 12 h. **f** Cell growth of control and F-TRIM25-expressing HCT116 cells treated with or without TG (1  $\mu$ M). Data represent the mean  $\pm$  SEM (n=6). **g** Western blot analysis of the levels of cleaved-caspase3 in control and F-TRIM25-expressing MCF7 cells treated with or without TG (1  $\mu$ M) for 12 h. **h** Quantification of apoptotic MCF7 cells expressing control and F-TRIM25, treated with or without TG (1  $\mu$ M) for 12 h. **i** Western blot analysis of HCT116 cells stably overexpressing control, F-TRIM25 or TRIM25-2EA. **j, k** Quantification of apoptotic HCT116 (**j**) and MCF7 (**k**) cells expressing control, TRIM25 or

TRIM25-2EA, treated with TG (1  $\mu$ M) for 12 h. For **a**, **b**, **f**, **h**, **j** and **k**, data represent the mean  $\pm$  SEM (n = 3, unless otherwise indicated). Statistical significance was assessed using two-tailed Student's t-test. n.s. not significant.

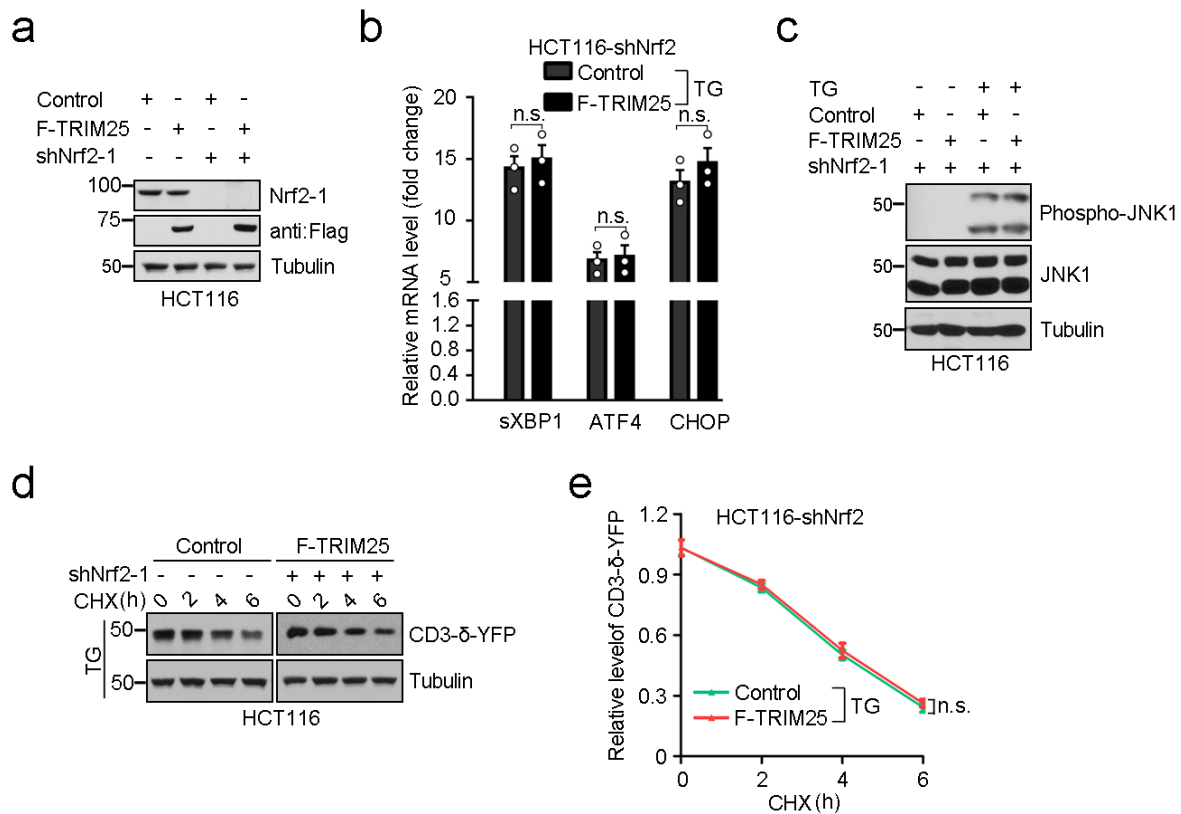

### Supplementary Figure 5 | Nrf2 is required for TRIM25 mediated inhibition of UPR signaling pathways and ERAD

**a** Western blot analysis the levels of Nrf2 in HCT116 cells stably knocking down control or Nrf2, and in these cells simultaneously stably expressing control or F-TRIM25 and analysis of Nrf2 and F-TRIM25. **b** Relative mRNA fold change of UPR genes: sXBP1, ATF4, CHOP in control and F-TRIM25-expressing HCT116 cells with stable knock down of Nrf2. **c** Western blot analysis of the levels of phospho-JNK/JNK in control and F-TRIM25-expressing HCT116 cells with stable knock down of Nrf2, treated with or without TG (1  $\mu$ M) for 12 h. **d, e** Half-life of CD3- $\delta$ -YFP in control and F-TRIM25-expressing HCT116 cells with stable knock down of Nrf2, pre-treated with TG (1  $\mu$ M) for 6 h and then treated with cycloheximide (CHX) at the indicated times and analyzed by western blot. Representative western blot (**d**) and the corresponding quantified graph (**e**) are shown. For **b** and **e**, data represent the mean  $\pm$  SEM (n = 3). Statistical significance was assessed using two-tailed Student's t-test. n.s. not significant.

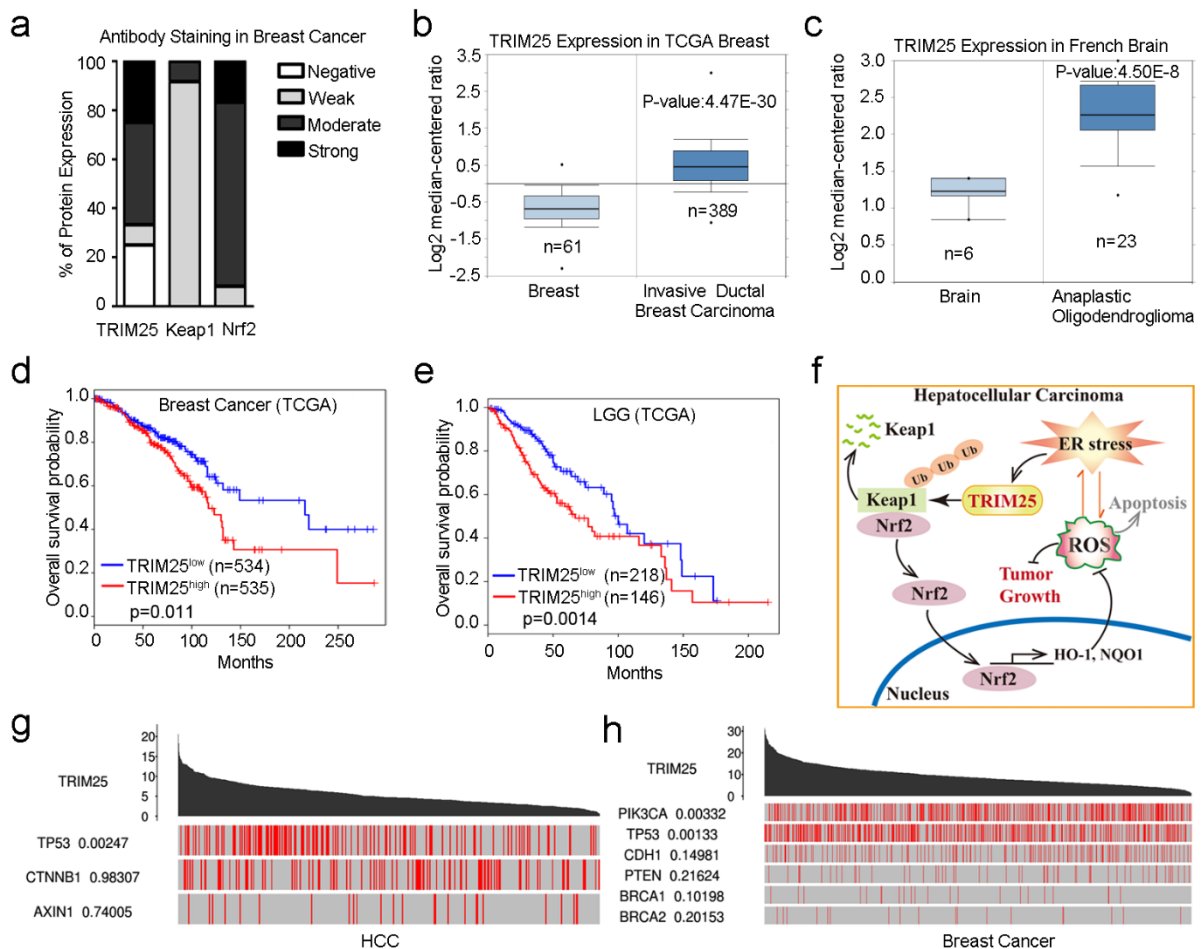

### Supplementary Figure 6 | Analysis of expression of TRIM25 in different tumor tissues

**a** The percentage of TRIM25, Keap1 and Nrf2 mRNA expression levels (grouped as negative, weak, moderate and strong) were analyzed from online database

(<https://www.proteinatlas.org/>) in human breast cancer tissues. **b, c** Comparison of the TRIM25 mRNA levels analyzed from the online database (<https://www.oncomine.org/>) in human breast cancers (**b**), French Brain cancers (**c**) and its corresponding normal tissues. The images are plotted on a log<sub>2</sub> scale and centered on the median of its expression levels. For **b**, normal tissues/Invasive ductal breast carcinoma tissues: n=61/389, maximum=0.505/3.002, median=-0.681/0.449, minimum=-2.31/-1.071. For **c**, normal tissues/Anaplastic oligodendroglioma tissues: n=6/23, maximum=1.404/2.991, median=1.23/2.257, minimum=0.843/1.169. Statistical significance was assessed using two-tailed Student's t-test.

**d, e** The overall survival and disease-free survival probability were compared between TRIM25 high and low expression in breast cancer and brain lower grade glioma (LGG) patients from TCGA database. The statistical significance was assessed using two-sided log-rank test, log-rank *p* values were shown. **f** A schematic model illustrating that TRIM25 regulates Keap1/Nrf2/ROS signaling pathway upon ER stress to promote HCC survival. TRIM25 is up-regulated during ER stress, which facilitates HCC cell survival by targeting Keap1 for ubiquitination and degradation, leading to Nrf2 translocated into the nucleus, activated Nrf2 downstream genes and reduced ROS levels. **g, h** The relationship of TRIM25 expression between driver mutated (red) and not-mutated (gray) samples in the HCC (**g**) and Breast cancer (**h**) were analyzed from the online database (<http://tumorsurvival.org/>).



Statistical significance was assessed using permutation test.

## Supplementary Figure 7 | Uncropped western blot images related to Figure 1

### Figure 1b

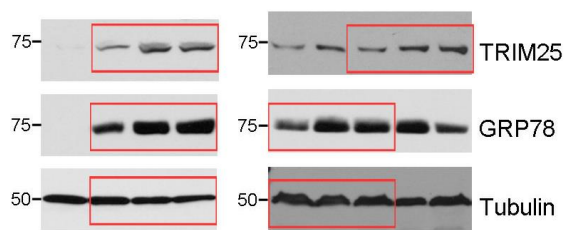

### Figure 1f

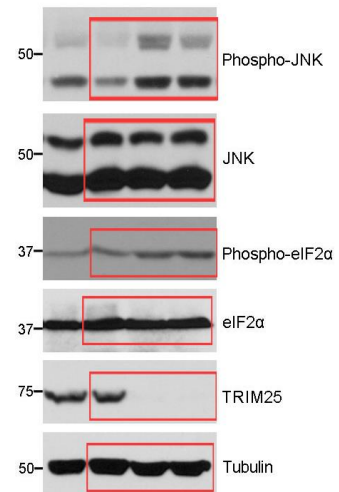

### Figure 1g

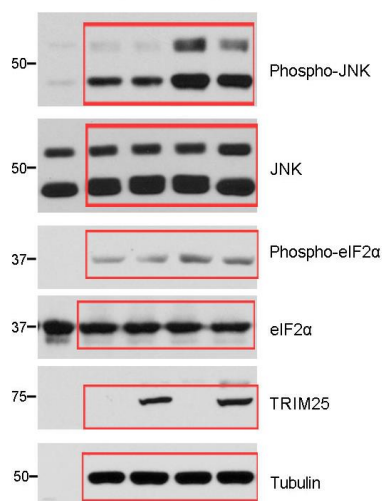

### Figure 1h

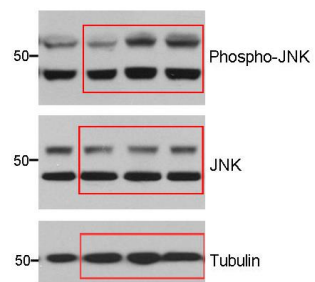

### Figure 1i

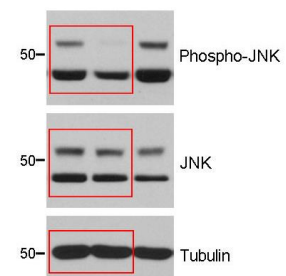

Supplementary Figure 8 | Uncropped western blot images related to Figure 2

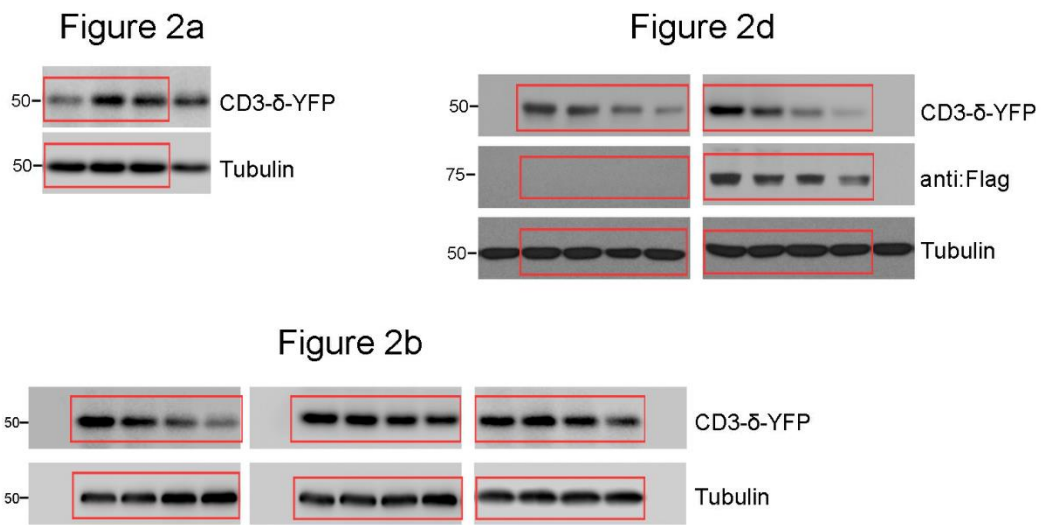

### Supplementary Figure 9 | Uncropped western blot images related to Figure 3

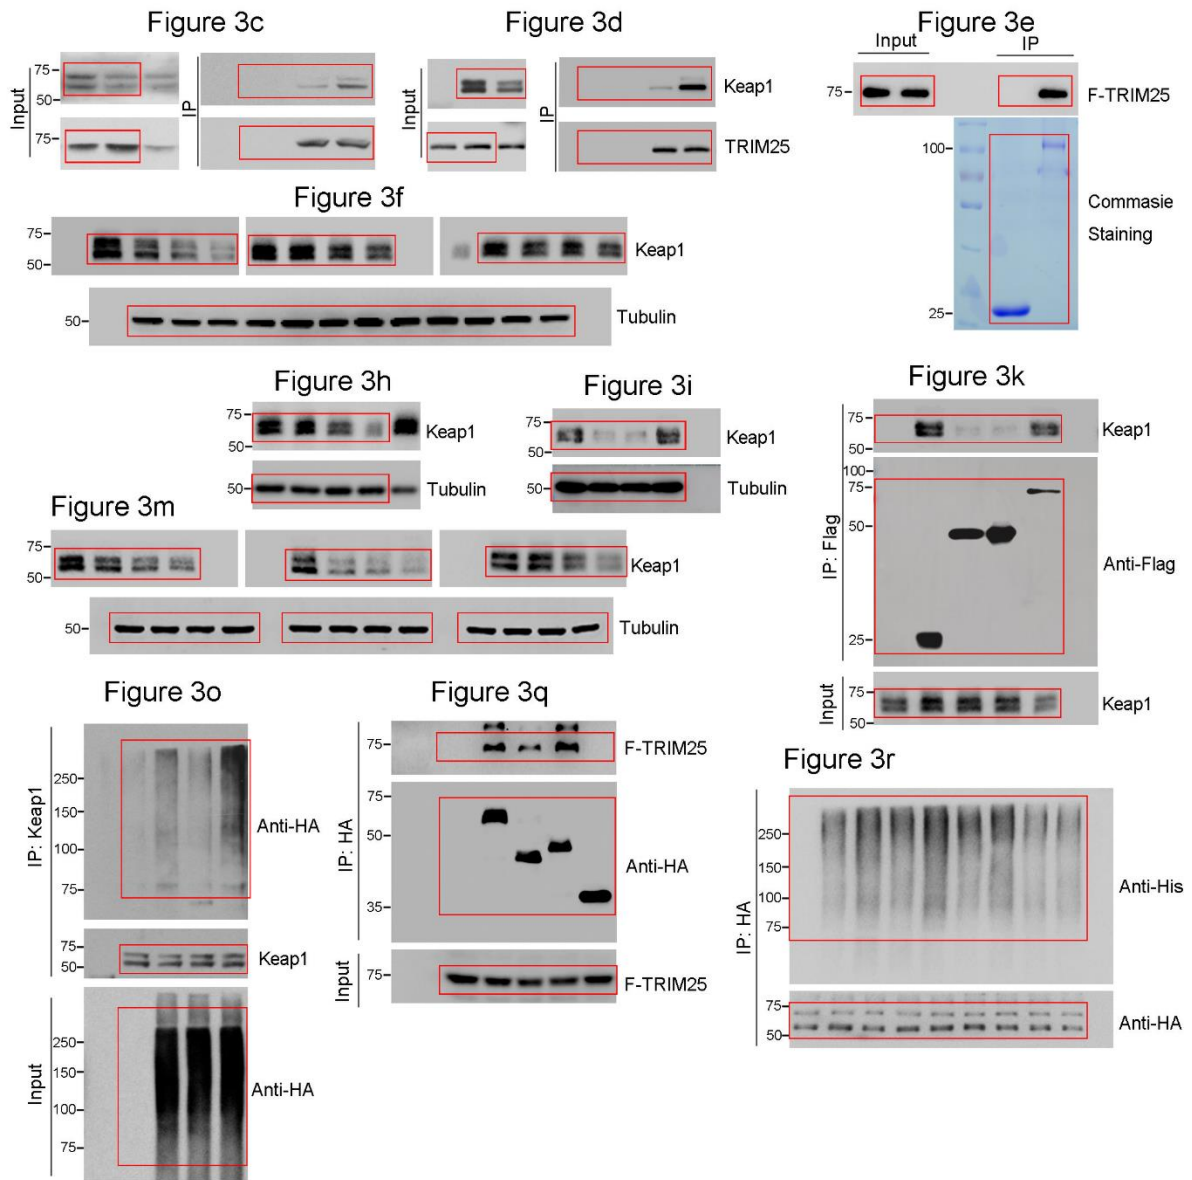

**Supplementary Figure 10 | Uncropped western blot images related to Figure 4**

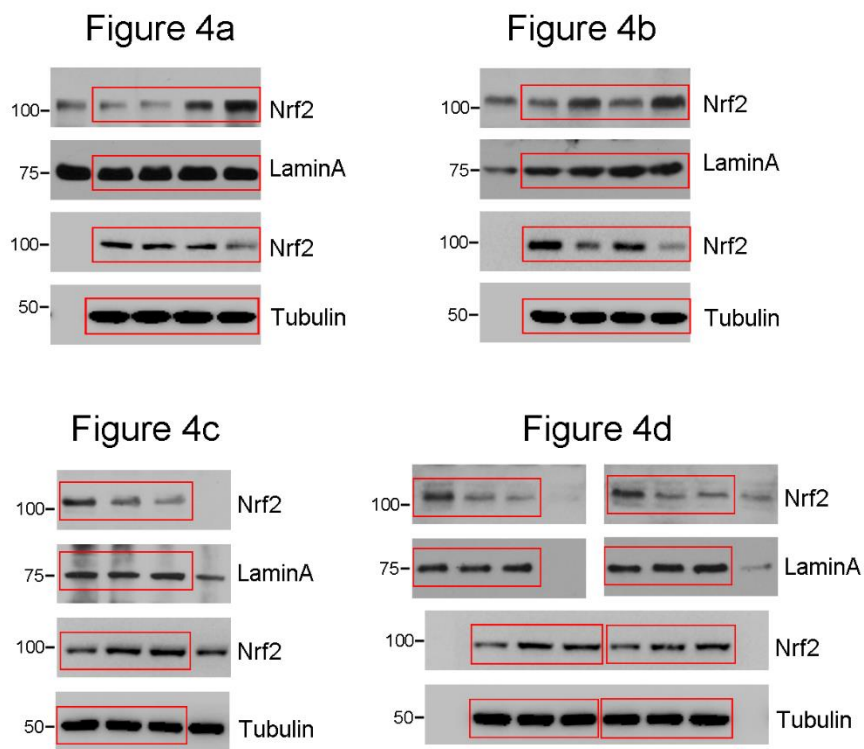

Supplementary Figure 11 | Uncropped western blot images related to Figure 5

Figure 5a

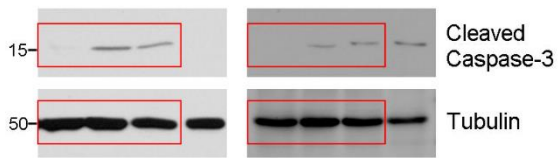

Figure 5b

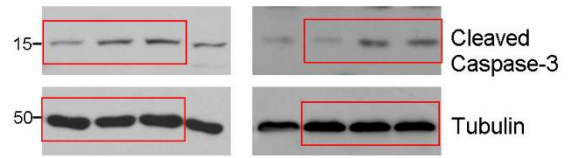

Figure 5e

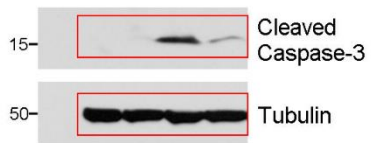

Figure 5f

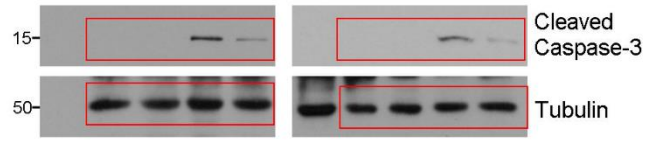

Figure 5i

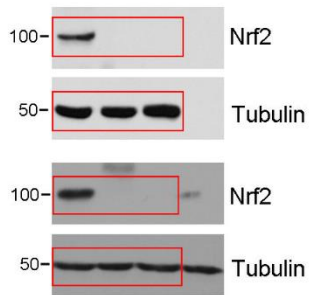

Figure 5l

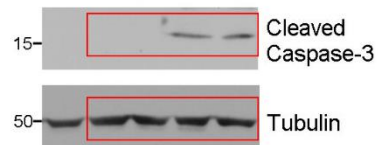

**Supplementary Table 1. Primer sequences for quantitative real-time PCR.**

| qRT-PCR primers for detecting ER stress and ROS related genes |                           |
|---------------------------------------------------------------|---------------------------|
| BiP-F                                                         | TGTTCAACCAATTATCAGCAAATC  |
| BiP-R                                                         | TTCTGCTGTATCCTTCCACCAGT   |
| sXBP1-F                                                       | CTGAGTCCGAATCAGGTGCAG     |
| sXBP1-R                                                       | ATCCATGGGGAGATGTTCTGG     |
| ATF4-F                                                        | GTTCTCCAGCGACAAGGCTA      |
| ATF4-R                                                        | ATCCTGCTTGCTGTTGTTGG      |
| CHOP-F                                                        | AGAACCAGGAAACGGAAACAGA    |
| CHOP-R                                                        | TCTCCTTCATGCGCTGCTTT      |
| HO1-F                                                         | ACATCGACAGCCCCACCAAGTTCAA |
| HO1-R                                                         | CTGACGAAGTGACGCCATCTGTGAG |
| NQO1-F                                                        | GGATTGGACCGAGCTGGAA       |
| NQO1-R                                                        | AATTGCAGTGAAGATGAAGGCAAC  |
| qRT-PCR primers for detecting all of TRIMs                    |                           |
| TRIM1-F                                                       | CCAGCCTCCGTGGTTCTTAAT     |
| TRIM1-R                                                       | ACAGGTCAATTCAGACTCCAGT    |
| TRIM2-F                                                       | TGCGCCAGATTGACAAGCA       |
| TRIM2-R                                                       | GCACCTCTCGCAGAAAGTG       |
| TRIM3-F                                                       | GCGACCTGGAGACCATTTGT      |
| TRIM3-R                                                       | GCTACTGCCGATGTGTTCTCG     |
| TRIM4-F                                                       | TGAGAATCAGCACGGAGTTTTCC   |
| TRIM4-R                                                       | CCTGGTCAACACTTCTTTTGGGA   |
| TRIM5-F                                                       | AAGTCCATGCTAGACAAAGGAGA   |
| TRIM5-R                                                       | GTTGGCTACATGCCGATTAGG     |
| TRIM6-F                                                       | ACTGGGTTGACGTGACCCT       |
| TRIM6-R                                                       | TCCCACAAACCTCACTTGCTCT    |
| TRIM7-F                                                       | TCCATGTTCAAGCCCTCTCC      |
| TRIM7-R                                                       | GGCCAGGTTCTCATTCTGCT      |
| TRIM8-F                                                       | CGTGGAGATCCGAAGGAATGA     |
| TRIM8-R                                                       | CAGGCGCTTGCTGACTCG        |
| TRIM9-F                                                       | GTGTGCGGCTCCTTCTATCG      |
| TRIM9-R                                                       | GCTGTATAGGCTCATCTTGCCA    |
| TRIM10-F                                                      | CTGCCCCATCTGTCAGGGTA      |
| TRIM10-R                                                      | GGTATCTCACAGTAGCGGGTAA    |
| TRIM13-F                                                      | GTTTTGCCTTGCTCCACAAC      |
| TRIM13-R                                                      | TCCTTACGGCATGTAGGACAC     |
| TRIM14-F                                                      | TGAAGGGGAAATTCAGTGAACCTC  |
| TRIM14-R                                                      | AGCCTCTGGACAGGATCGG       |
| TRIM15-F                                                      | TCCCTGAAGGTGGTCCATGAG     |

|          |                         |
|----------|-------------------------|
| TRIM15-R | CAGGATCTTGCCCGAGGATT    |
| TRIM16-F | GTCCTGTCTAACCTGCATGGT   |
| TRIM16-R | GGCAGTATCGCCAGTTGTG     |
| TRIM18-F | CTGACCTGCCCTATTTGTCTG   |
| TRIM18-R | GCACAGTGTGATACTAGGATGC  |
| TRIM20-F | TAAGACCCCTAGTGACCATCTG  |
| TRIM20-R | TTCCCATAGTAGGTGACCAG    |
| TRIM22-F | CTGTCCTGTGTGTCAGACCAG   |
| TRIM22-R | TGTGGGCTCATCTTGACCTCT   |
| TRIM23-F | TGGTTGTAACAAGCTCGGAG    |
| TRIM23-R | ACTCTAGCACCTTCACTACAGC  |
| TRIM25-F | AATCGGCTGCGGGAATTTTC    |
| TRIM25-R | TCTCACATCATCCAGTGCTCT   |
| TRIM26-F | TGCACTACTACTGTGAGGACG   |
| TRIM26-R | TCCTAGGGTACTCAGGTGGT    |
| TRIM28-F | TTTCATGCGTGATAGTGGCAG   |
| TRIM28-R | GCCTTACACAGGTCTCACAC    |
| TRIM29-F | CTGTTGCGGGCAATGAGT      |
| TRIM29-R | TGCCTCCATAGAGTCCATGC    |
| TRIM31-F | AACCTGTCACCATCGACTGTG   |
| TRIM31-R | TGATTGCGTTCTTCTTACGG    |
| TRIM33-F | ATGTGGAGAGTGGCTATGTAAGA |
| TRIM33-R | GGGCGTTGACCAGATGCTC     |
| TRIM34-F | GACGCTGGATAAGTTTGCAGA   |
| TRIM34-R | CCACCCATACGCACCATTTTC   |
| TRIM35-F | TGAAGGAGGACGACGTTTCTT   |
| TRIM35-R | GCCCAGGTACTIONGCAGACATC |
| TRIM36-F | GAGCTGTTTACCCACCCATTG   |
| TRIM36-R | CTGATCCCACATCGTTGAATGA  |
| TRIM38-F | GAGCCTGATGACGAACCCAG    |
| TRIM38-R | TCTTGATCCGTCTCTTTGAGGG  |
| TRIM39-F | GAAAGGGCGAGTTGACTCCAC   |
| TRIM39-R | GGCTGCATATTTGTCCCAT     |
| TRIM40-F | ACATCTCTTCTGTCGAGTGTGC  |
| TRIM40-R | GGCAGATATAGCCTGTCCCTA   |
| TRIM41-F | CTGCCGAGTTTGTGTAACCCA   |
| TRIM41-R | CTCCTCCATGTCACCCTCGTA   |
| TRIM42-F | GGCCAATGATCCCAACTGTAA   |
| TRIM42-R | AGCAGCGGCTCTCATAGTAGT   |
| TRIM43-F | AGGGAACCATCACCGAAAATG   |



|          |                         |
|----------|-------------------------|
| TRIM43-R | TTGTTTGCCTATGGGTCCAC    |
| TRIM44-F | CCATCTGGCCGAATACGTCC    |
| TRIM44-R | TGCCTCGTTTCTATCCCT      |
| TRIM45-F | AACTCAGGCAAGACTCACTGC   |
| TRIM45-R | CCCTCGGATGTCCACTACTG    |
| TRIM46-F | TTCCGACCCAAGGGCCTTAT    |
| TRIM46-R | AGAGTTGACATACCAGGCGTT   |
| TRIM47-F | CTGAGCAGTCCAAAGTCTGA    |
| TRIM47-R | CTACGGCTGCACTCTTGATG    |
| TRIM48-F | GGATGTGACCGTCAAATCCG    |
| TRIM48-R | CACCCAAGACTAAAGAGTCCCT  |
| TRIM49-F | ATCTTACAGGTCTTTCAGGGGG  |
| TRIM49-R | GCACTGGACAAGAAATGGGAT   |
| TRIM50-F | GGCCCTTAGAAGGCGCATT     |
| TRIM50-R | GCAGGGTCCAAGTCTGAGAGG   |
| TRIM51-F | GGCCCTGTTTGTACTCAACT    |
| TRIM51-R | TTCTCTGCCGCGTTGTCTTC    |
| TRIM52-F | ATGGCTGGTTATGCCACTACT   |
| TRIM52-R | CTCGTCCCTTACTCCACAG     |
| TRIM54-F | ATCGTGCAGGCATGAGGTTG    |
| TRIM54-R | CCTCGCACATGAGGTGCTG     |
| TRIM55-F | TTGTCAGCACAACTGTGTAG    |
| TRIM55-R | CCCATGTCTATCCAAAACCACTT |
| TRIM56-F | GCCTGCATACCTACTGCCAAG   |
| TRIM56-R | GCAGCCCATTGACGAAGAAGT   |
| TRIM58-F | TACCAGGTAAAGCTCCAGATGG  |
| TRIM58-R | GAAAGCCACGATGCTTCTCAA   |
| TRIM60-F | CTCCAAGAGGAGTCTAGCTGT   |
| TRIM60-R | TCCTTCCAGGATACACTGAGG   |
| TRIM61-F | TCTGTCAGAAAGACCTAGAGCTT |
| TRIM61R  | CACGGTGCATTGTATTCCTCC   |
| TRIM62-F | CGAGCAGCATCAGGTCACC     |
| TRIM62-R | CCAGTTGTGCTTGAGCAG      |
| TRIM63-F | CTTCCAGGCTGCAAATCCCTA   |
| TRIM63-R | AACTCCGTGACGATCCATGA    |
| TRIM65-F | CGCCAACCGTCACTTCTATCT   |
| TRIM65-R | ACAGGGTCAGGGTCCCTACC    |
| TRIM66-F | TCCCGGAGACTTCACCTTGTA   |
| TRIM66-R | GTTCCACCACTAGGCAGCTAT   |
| TRIM67-F | CGTGTCCCGAGCATGAAATG    |

|          |                        |
|----------|------------------------|
| TRIM67-R | CCTGAGATAGTTGTGCCTTGTG |
| TRIM68-F | GGAGCCCATGAGCATTGACT   |
| TRIM68-R | GACAGGTGTAACCCAGTTCT   |
| TRIM69-F | CTTGCCATCCAACAGGGTCAA  |
| TRIM69-R | TTCCTTGTGAGCAGCAATAGC  |
| TRIM71-F | GTACCCATCTGTCGTGAGTGC  |
| TRIM71-R | CGGCTTTGACCTCCGACTG    |
| TRIM72-F | GAGGTGGATGTTGGCGACAA   |
| TRIM72-R | CCGAAGCTCAGGTAAAGGC    |
| TRIM73-F | CAGGAGCAGAAGAAGGTGGATG |
| TRIM73-R | CCGCACTGTAGCATTAGGGACT |
| TRIM74-F | CAGGAGCAGAAGAAGGTGGATG |
| TRIM74-R | AACTCATGGTGGTCCTCATTCC |
